# Supplementary material
Source: PubMed Central journal article supplement (PMC2268130)

# Nature Variables 1988 to Present

(variables with greatest per capita)

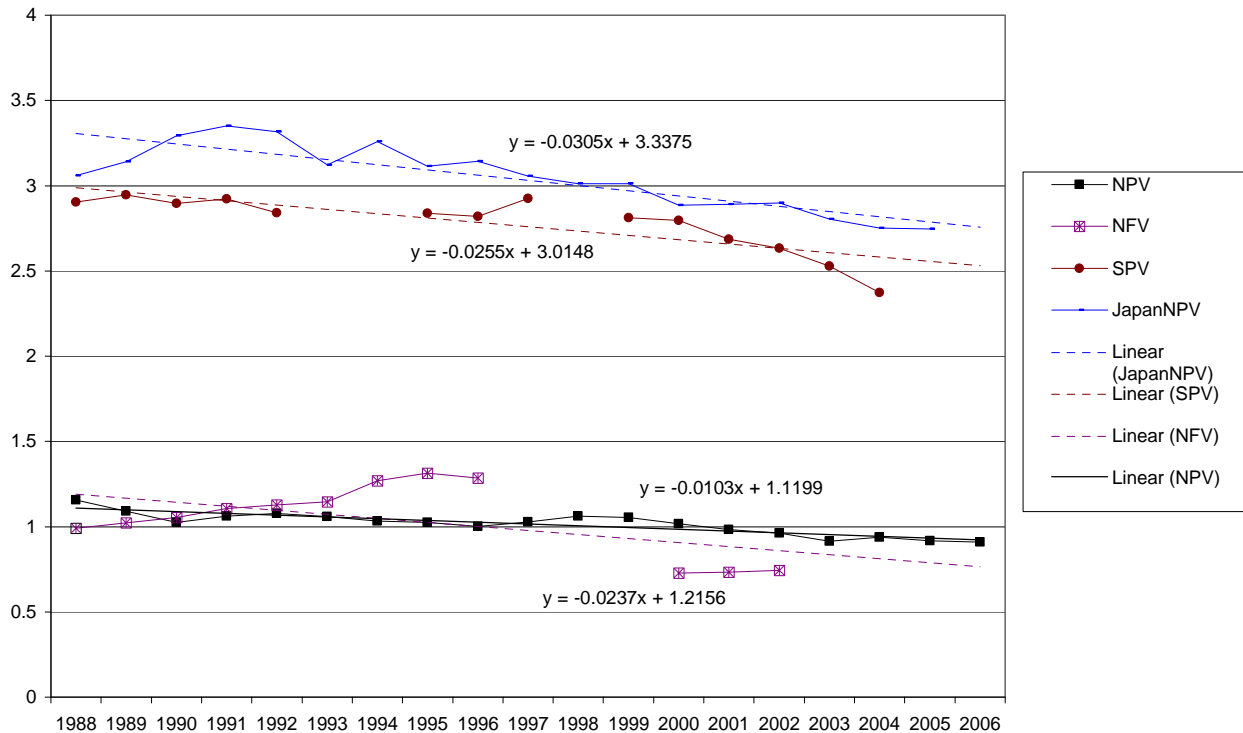

Supplement: supp_0709893105_09893Fig4.pdf [file supp_0709893105_09893Fig4.pdf]

# US per capita Camping 1988 to Present

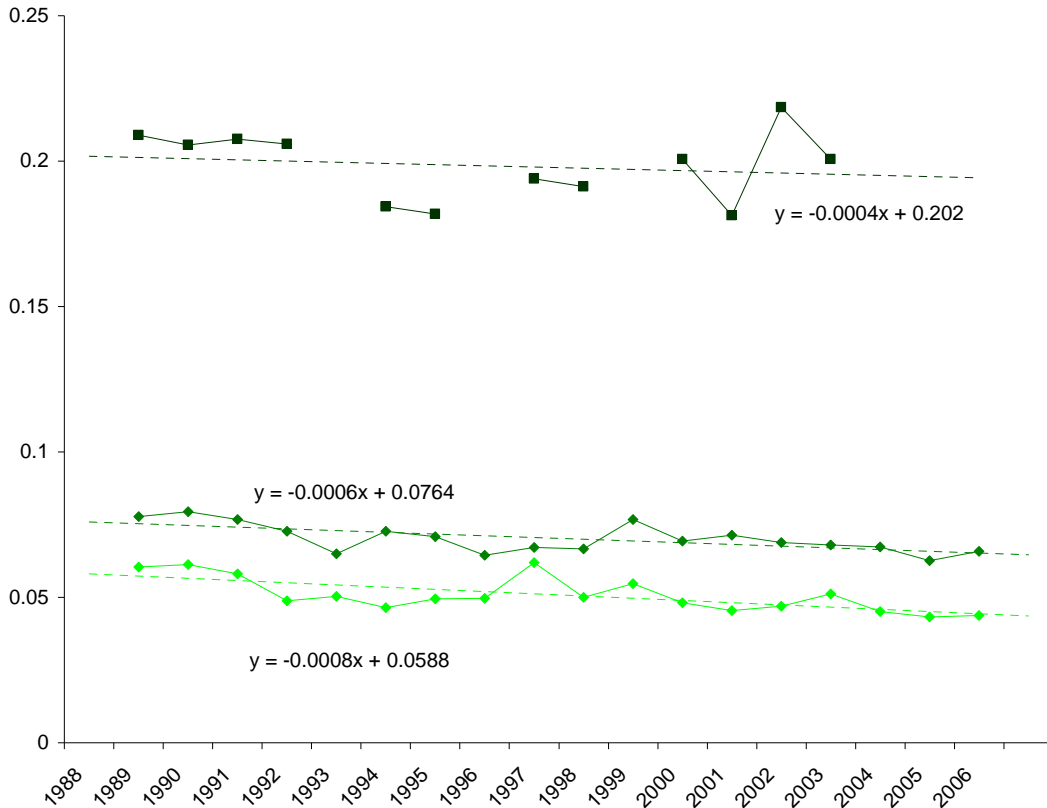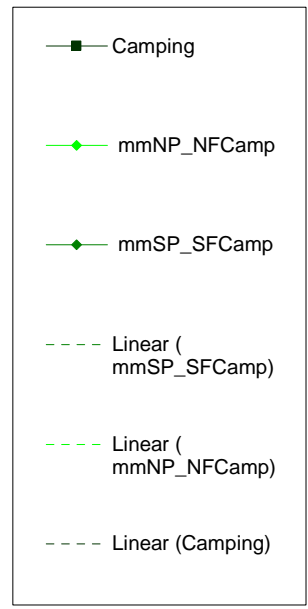

Supplement: supp_0709893105_09893Fig5.pdf [file supp_0709893105_09893Fig5.pdf]
